# Supplementary material
Source: MDPI journal article supplement (https://www.mdpi.com/2225-1154/8/12/139)
Supplement: s1 [file s1]

RCP 6

RCP 8.5

Rainfed

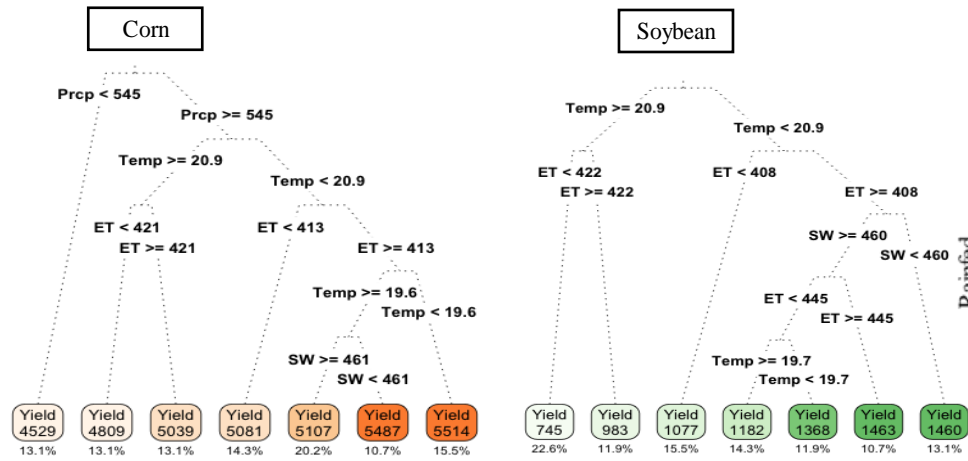

Irrigated

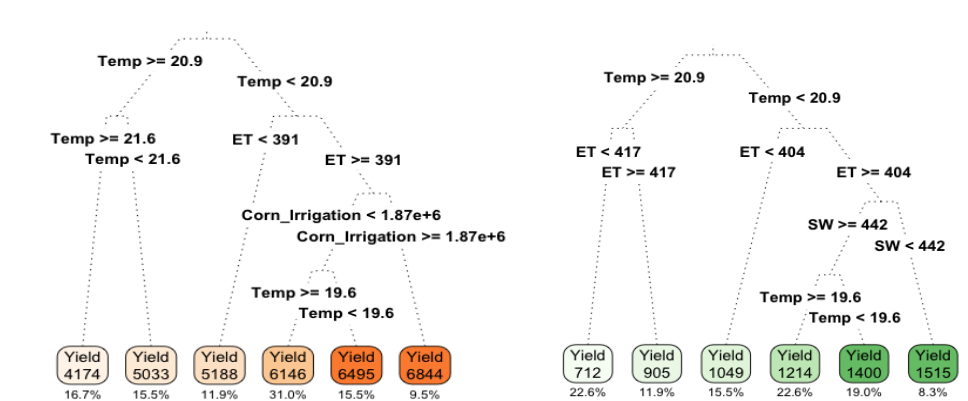

Rainfed

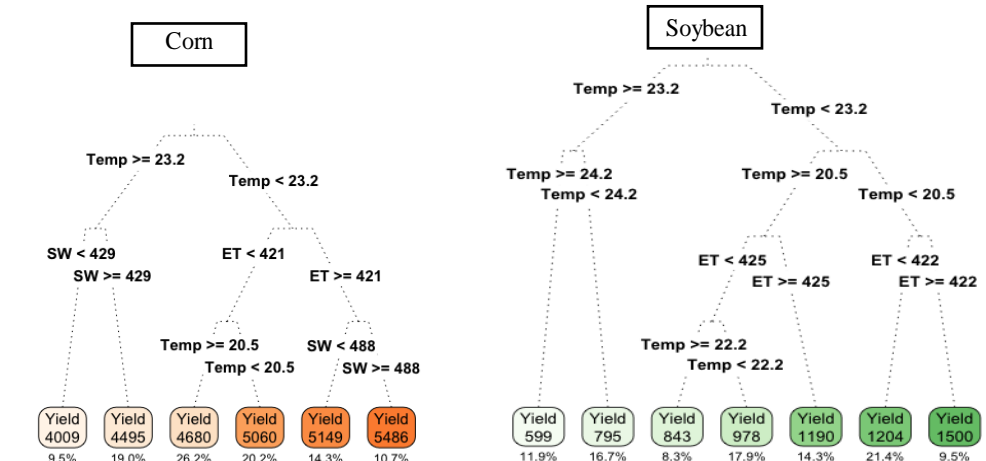

Irrigated

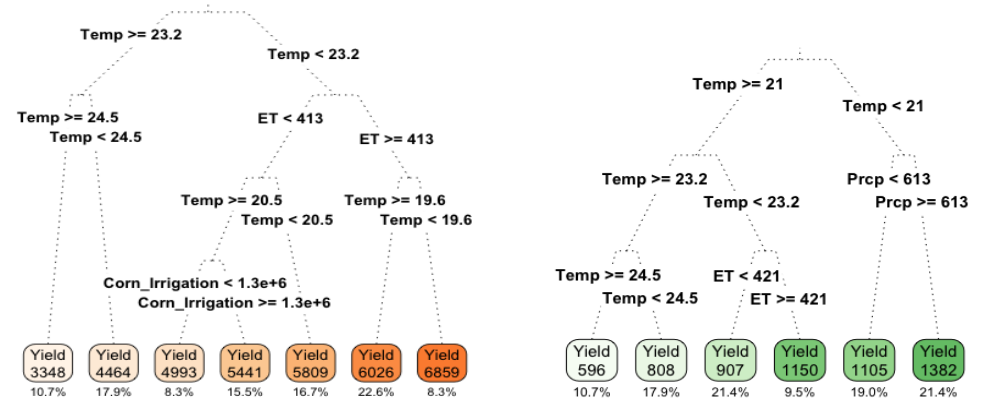

**Supplement Figure S1.** Outcomes from decision tree analysis for corn and soybean yield variations for rainfed and irrigated conditions under RCP 6 and 8.5. The precipitation (Prpc), evapotranspiration (ET), and soil water (SW) storage are presented in mm, and temperature (temp) is presented in °C. Corn and soybean yields are represented by orange and green color, respectively. Crop yields are presented in kg/ha, and the percentage are the fraction of total crop yield in each node.
